# Supplementary material for: Magnetic microwire rheometer reveals differences in hydrogel degradation via disulfide reducing agents
Source: Royal Society of Chemistry journal article supplement (doi:10.1039/d4sm01118j), 2024-12-20
Supplement: d4sm01118j1.pdf [file d4sm01118j1.pdf]

### Supplementary Material

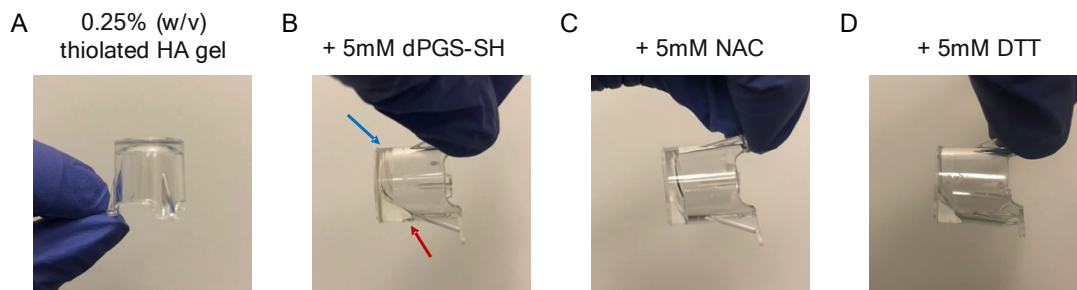

**Figure S.1: Images of the disulfide crosslinked HA hydrogel before and after treatment with reducing agents.** Representative images of 0.25% HA gel (A) at time zero, (B) after treatment with 5mM dPGS-SH (red arrow points to liquid phase, blue arrow points to gel phase), (C) after treatment with 5mM NAC, and (D) after treatment with 5mM DTT.

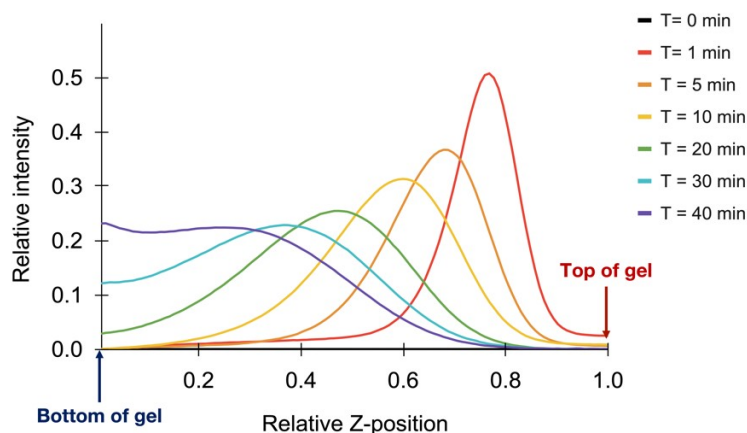

**Figure S.2: Diffusion of 20kDa FITC Dextran into 0.25% disulfide crosslinked HA hydrogel.** Florescence intensity as a function of relative z-position in the gel over time after the addition of 10% (v/v) FITC dextran solution to the surface of the gel. The bottom of the gel was located at  $z = 0$ .

A

Thiolated dendritic polyglycerol sulfate (dPGS-SH)

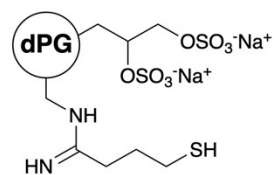

MW: 20kDa

N-acetylcysteine (NAC)

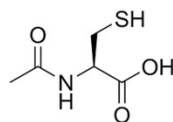

MW: 163 Da

Dithiothreitol (DTT)

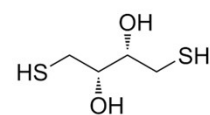

MW: 154 Da

B

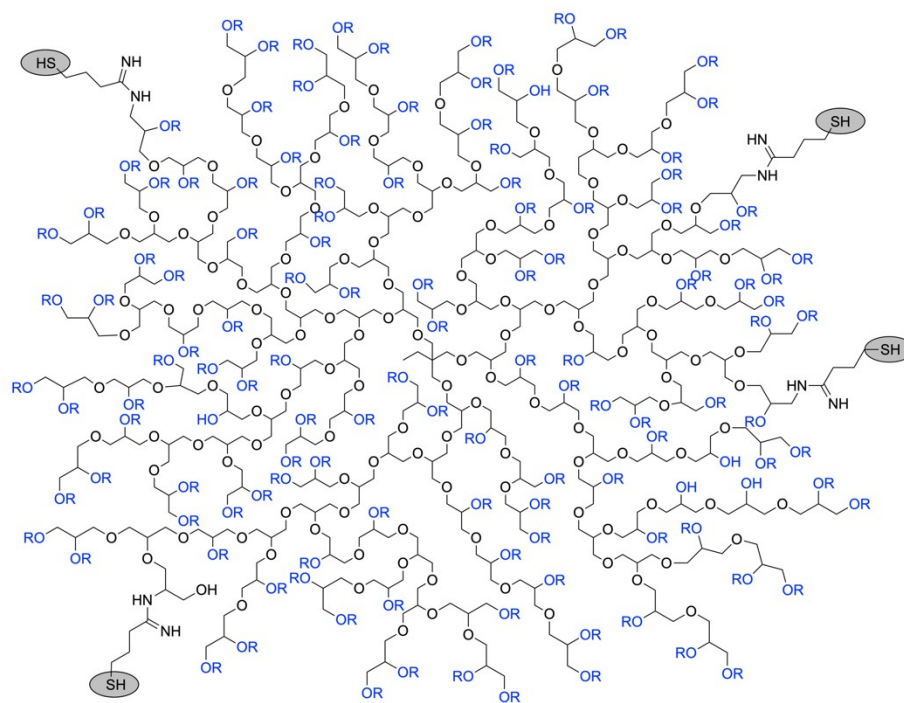**dPGS-SH**with R = SO<sub>3</sub><sup>-</sup>Na<sup>+</sup> (83%) and H (17%)

**Figure S.3: Reducing agent structures.** (A) Chemical structures and molecular weights of dPGS-SH, NAC, and DTT. (B) Detailed view of dPGS-SH structure.
